# Supplementary material for: Tunable hybrid carbon metabolism coordination for the carbon-efficient biosynthesis of 1,3-butanediol inEscherichia coli
Source: Royal Society of Chemistry journal article supplement (doi:10.1039/d1gc02867g), 2021-01-01
Supplement: d1gc02867g1.pdf [file d1gc02867g1.pdf]

## 19 Supplementary Note

### 20 Yield calculation

21 The yield calculation is based on the methods described previously by Deepak Dugar *et al.* <sup>1</sup>.  
22 Theoretical maximum yield ( $Y^E$ ) is the maximum amount of a product produced from the  
23 carbon source, which is merely calculated from the ratios of degree of reduction of substrate  
24 to that of product. The theoretical pathway yield ( $Y^p$ ) is the maximum amount of a product  
25 produced by a specified pathway from its stoichiometry, which can be resolved from the  
26 following equations:

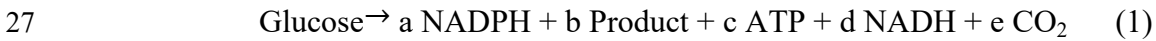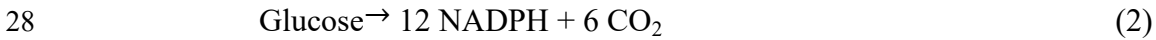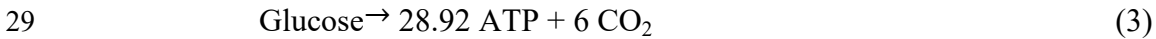

30

31 The theoretical pathway yield ( $Y^p$ ) can be calculated with

32 
$$Y^p = Y * \frac{1}{1 - a/12 - c/28.92}$$
 (4)

33  $Y$  is product yield based on equation (1) ( $Y=b$ ). When  $a>0$ , which means NADPH is excessive,  
34  $a$  is assigned 0 in the equation (4); when  $c>0$ , which means ATP is abundant,  $c$  is assigned 0  
35 in the equation (4). To calculate  $Y^p$  without cofactor imbalance, in which case NADH and  
36 NADPH are interconvertible,  $a$  is assigned  $(a+c)$  if  $(a+c)<0$ , otherwise  $a$  is assigned 0 in the  
37 equation (4).

38

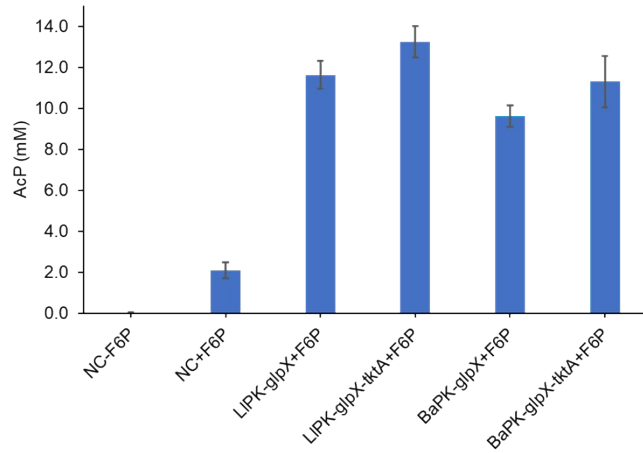

39

40 **Fig. S1.** Enzyme assay of F6P-to-AcP conversion using crude enzyme extracts of wildtype *E.*  
 41 *coli* BW25113 (F') harboring empty plasmid pZE12-luc (NC, negative control), expressing  
 42 BaPK and *glpX* (BaPK-*glpX*), expressing BaPK, *glpX* and *tktA* (BaPK-*glpX*-*tktA*), expressing  
 43 LIPK and *glpX* (LIPK-*glpX*), expressing LIPK, *glpX* and *tktA* (LIPK-*glpX*-*tktA*). 10 mM F6P  
 44 was added as the substrate. Data indicated the mean  $\pm$  standard deviation ( $n = 3$  independent  
 45 biological replicates).

46

47

48

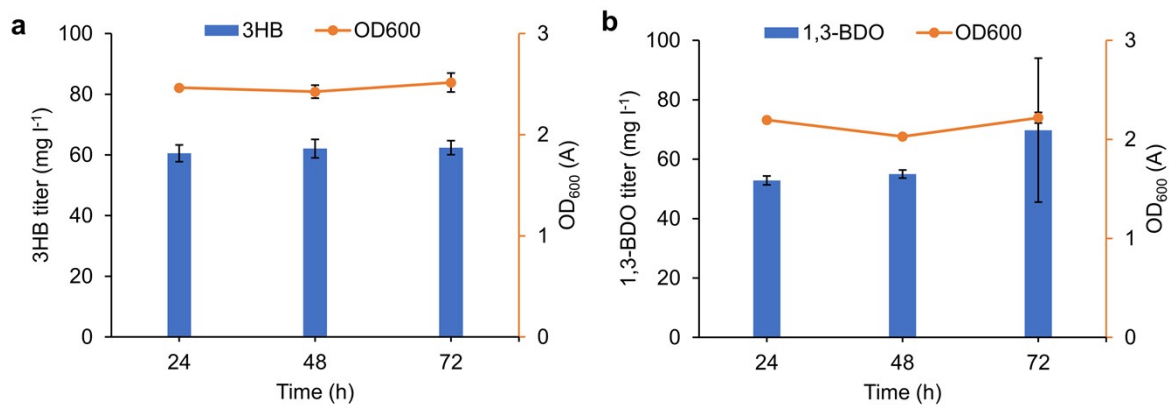

49

50 **Fig. S2.** Shake flask experiments with M9 medium with 5 g l<sup>-1</sup> yeast extract without  
 51 glucose in 72 h. (a) 3HB production with *E. coli* BW25113 (F') harboring p3HB. (b) 1,3-BDO  
 52 production with *E. coli* BW25113 (F') harboring p3HB and pZE-MaCAR. Data indicated the  
 53 mean  $\pm$  standard deviation ( $n = 3$  independent biological replicates).

54

55

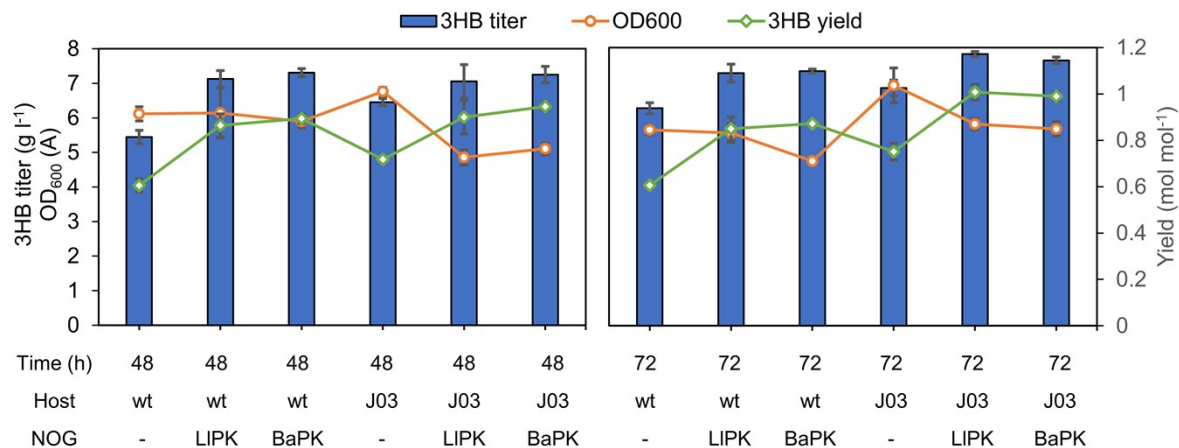

56

57 **Fig. S3. Comparison of 3HB production with or without  $P_{LlacO1}$ -controlled LIPK and**  
 58 **BaPK based NOG pathway.** Shake flask experiments were performed with wildtype *E. coli*  
 59 BW25113 (F') (wt) and its derived mutant strain J03 for 48 h and 72 h. Data indicated the  
 60 mean  $\pm$  standard deviation ( $n = 3$  independent biological replicates).

61

62

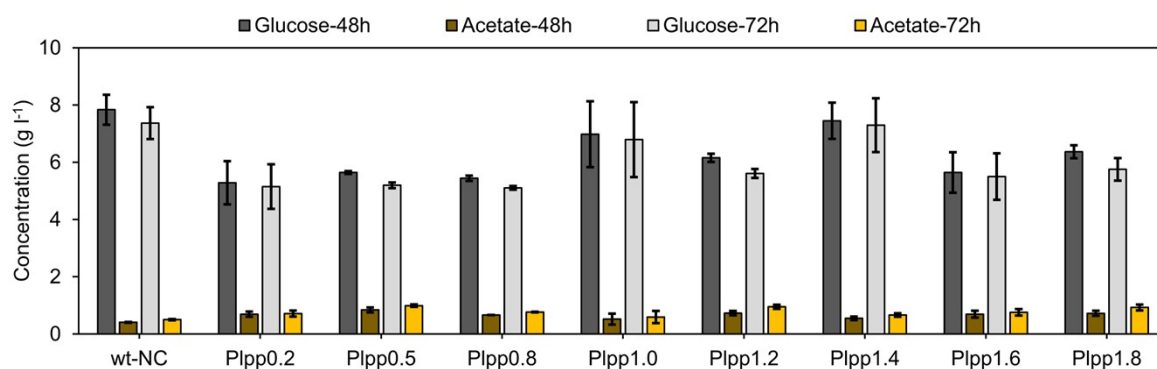

63

64 **Fig. S4. Glucose remaining and acetate accumulation during 3HB production via  $P_{Ippx}$ -**  
 65 **tuned LIPK-based NOG pathway in strain J03.** Samples from 48 h and 72 h cultivation were  
 66 analyzed by HPLC analysis. Data indicated the mean  $\pm$  standard deviation ( $n = 3$  independent  
 67 biological replicates).

68

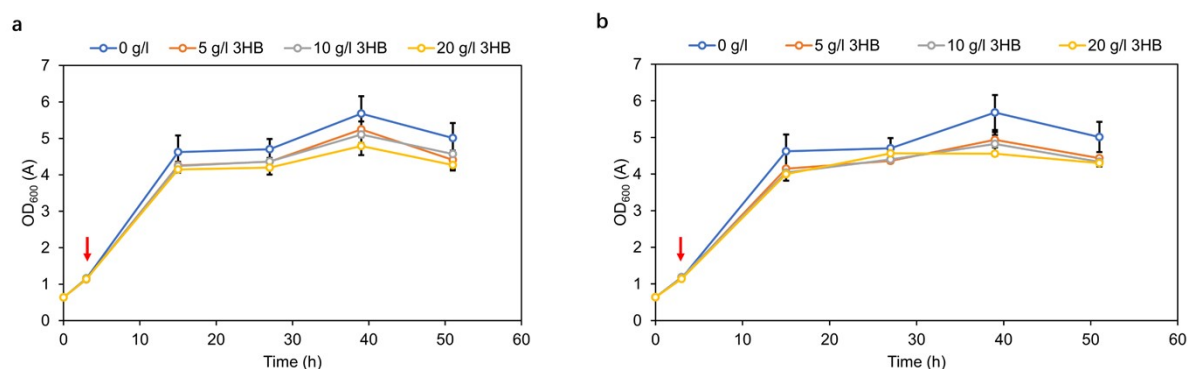

69

70 **Fig. S5. Test of the 3HB and 1,3-BDO toxicity to *E. coli* BW25113 (F').** 3HB (a) or 1,3-  
 71 BDO (b) with different concentrations (0-20 g l<sup>-1</sup>) was fed to BW25113 (F') at 3 h post

72 inoculation as indicated by the red arrows. Data indicated the mean  $\pm$  standard deviation ( $n = 3$   
73 independent biological replicates).

74

75

76

77

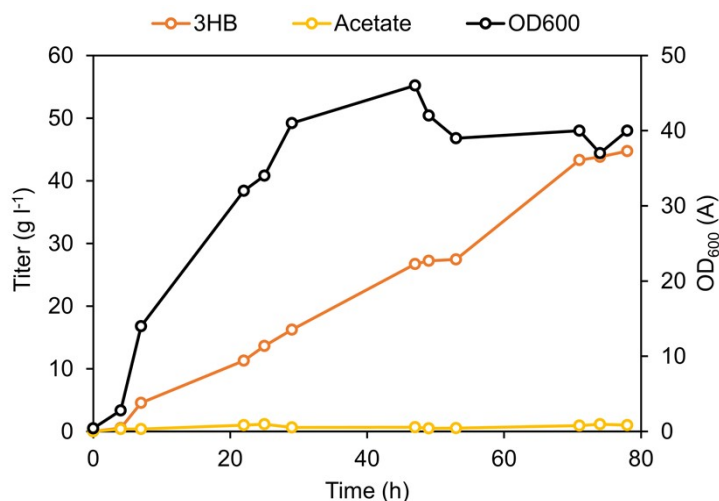

78

79 **Fig. S6. A duplicate run of fed-batch cultivation of J03 containing p3HB and pZLPK1.4**  
80 **in 1-l bioreactor.**

81

82

83

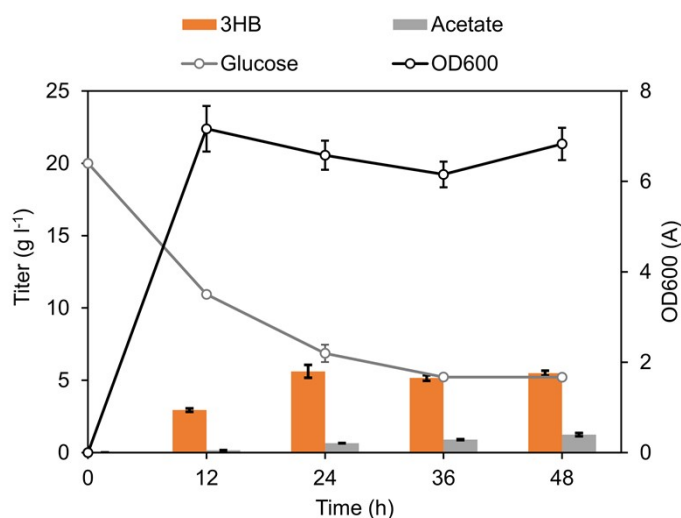

84

85 **Fig. S7. 3HB production via strain J06 harboring chromosomally integrated 3HB**  
86 **pathway.** Data indicated the mean  $\pm$  standard deviation ( $n = 3$  independent biological  
87 replicates).

88

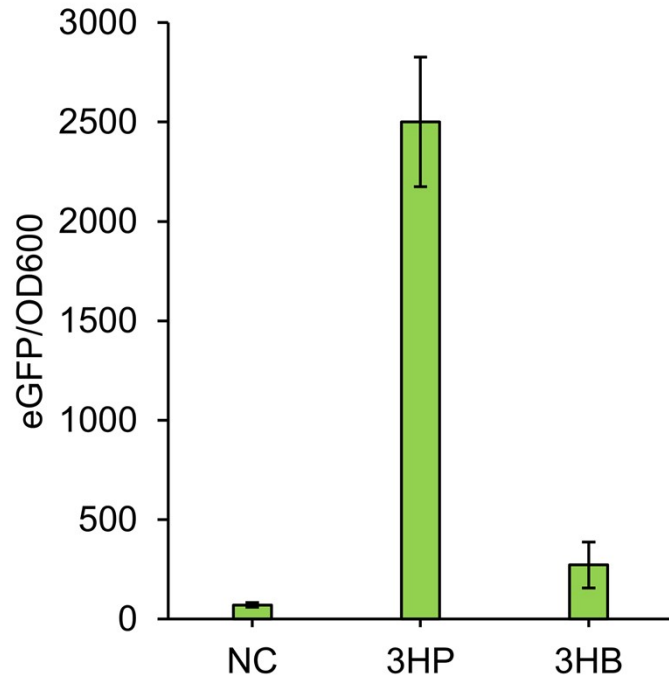

89

90 **Fig. S8. Induction of wildtype HpdR/P<sub>hpdH</sub> sensor regulator system by 3HP and 3HB.** The  
 91 eGFP induction assay was performed with strain *E. coli* BW25113 (F') harboring pZE-HpdR-  
 92 PhpdH-eGFP. 3HP and 3HB were added at a final concentration of 1 g l<sup>-1</sup>. NC indicates the  
 93 negative control without any inducer. Data indicated the mean ± standard deviation (*n* = 3  
 94 independent biological replicates).

95

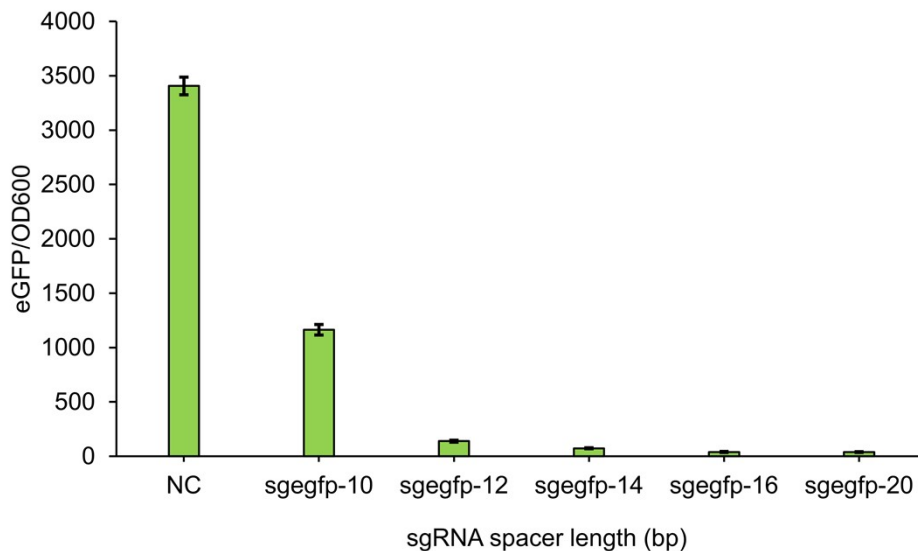

96

97 **Fig. S9. Effects of spacer length on CRISPRi.** The eGFP repression assay was performed  
 98 with strain J07 transformed with pZE-eGFP and pCS-sgRNA harboring sgegfp with spacer  
 99 length of 10, 12, 14, 16, and 20 bp. NC indicates the negative control with pZE-eGFP and  
 100 pCS27. Data indicated the mean ± standard deviation (*n* = 3 independent biological replicates).  
 101

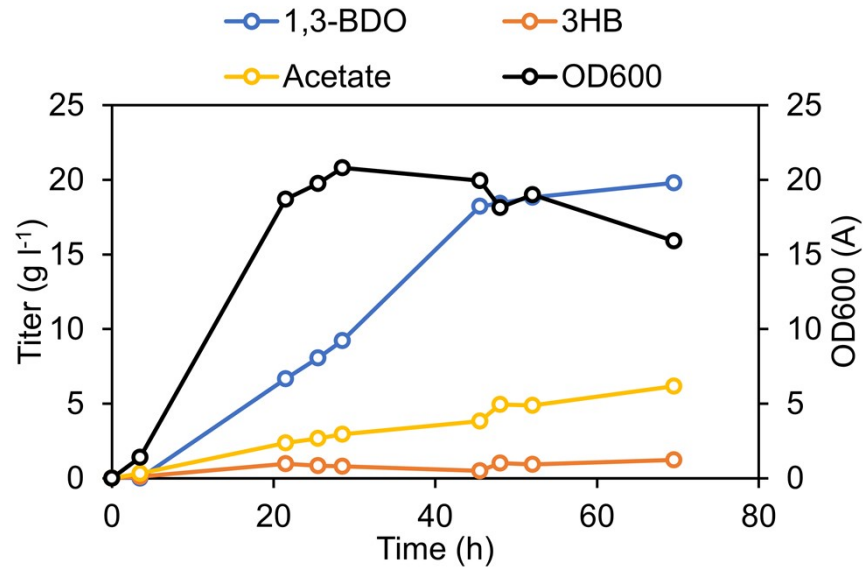

102

103 **Fig. S10. A duplicate run of fed-batch cultivation of J07 containing pZE-MaCAR, pCS-**  
 104 **V1-*sgaccA-14* and pSLPK0.5 in 1-l bioreactor.**

105

106 **Table S1. Reactions and performance of various carbon metabolism involved in this**  
 107 **study.**

| <b>Carbon Metabolism <sup>a</sup></b> | <b>Metabolites per glucose</b>                                    | <b>N/A stoichiometry <sup>b</sup></b> | <b>C-yield <sup>c</sup></b> |
|---------------------------------------|-------------------------------------------------------------------|---------------------------------------|-----------------------------|
| EMP                                   | 2Acetyl-CoA+2CO <sub>2</sub> +4NADH+2ATP                          | 2                                     | 66.7%                       |
| PP                                    | 1.67Acetyl-CoA+2.67CO <sub>2</sub> +3.33NADH+2NADPH+1.67ATP       | 3.19                                  | 55.7%                       |
| NOG                                   | 3Acetyl-CoA-1ATP                                                  | 0                                     | 100%                        |
| EMP+PP                                | 1.835Acetyl-CoA+2.335CO <sub>2</sub> +3.665NADH+1NADPH+1.835ATP   | 2.54                                  | 61.2%                       |
| EMP+NOG                               | 2.5Acetyl-CoA+1CO <sub>2</sub> + 2NADH+0.5ATP                     | 0.8                                   | 83.3%                       |
| PP+NOG                                | 2.335Acetyl-CoA+1.335CO <sub>2</sub> +1.67NADH+1NADPH+0.335ATP    | 1.14                                  | 77.8%                       |
| EMP+PP+NOG                            | 2.223Acetyl-CoA+1.556CO <sub>2</sub> +2.443NADH+0.67NADPH+0.89ATP | 1.4                                   | 74.1%                       |

108 <sup>a</sup> Glucose flux are presumed to equally enter the combined carbon metabolisms referred.

109 <sup>b</sup> NAD(P)H/acetyl-CoA stoichiometry.

110 <sup>c</sup> C-yield, or carbon yield, is the ratio of carbon in product acetyl-CoA to carbon in glucose.



111 **Table S2. Metabolic pathways for acetyl-CoA derived products involved in this study.**

| Product pathways | Metabolic reactions                                                                                                                                                       | N/A<br>stoichiometry |
|------------------|---------------------------------------------------------------------------------------------------------------------------------------------------------------------------|----------------------|
| 3HB              | $2 \text{ Acetyl-CoA} + 1 \text{ NADH} \rightarrow 3\text{HB} + 1 \text{ NAD}^+$                                                                                          | 0.5                  |
| 1,3-BDO          | $2 \text{ Acetyl-CoA} + 1 \text{ NADH} + 2 \text{ NADPH} + 1 \text{ ATP} \rightarrow 1,3\text{-BDO} + 1 \text{ NAD}^+ + 2 \text{ NADP}^+ + 1 \text{ AMP} + 1 \text{ PPi}$ | 1.5                  |

112

113 **Table S3. Stoichiometric coefficients in equation (1) with multiple carbon metabolisms <sup>a</sup>.**

| Product pathways | NADPH (a) | Product (b)     | ATP (c)              | NADH (d)    | CO <sub>2</sub> (e) |
|------------------|-----------|-----------------|----------------------|-------------|---------------------|
| 3HB              | 2y        | -0.5x-0.67y+1.5 | 3x+2.67y-1           | 4.5x+4y-1.5 | 2x+2.67y            |
| 1,3-BDO          | x+3.33y-3 | -0.5x-0.67y+1.5 | 4x+4y-4 <sup>b</sup> | 4.5x+4y-1.5 | 2x+2.67y            |

114 <sup>a</sup> 1 mol glucose is metabolized via three carbon metabolisms including EMP pathway (x mol),  
 115 PP pathway (y mol) and NOG pathway ((1-x-y) mol). <sup>b</sup> Two ATP inputs were needed  
 116 considering the additional need of an additional ATP for regeneration of AMP to ADP.  
 117

118 **Table S4. Pathway yields for acetyl-CoA derived products with coordinated carbon**  
 119 **metabolism.**

| Products | NADPH (a)                      | NADPH (a) | Product (b) | ATP (c) | NADH (d) | CO <sub>2</sub> (e) | Pathway yields (Y <sup>p</sup> ) <sup>b</sup> |
|----------|--------------------------------|-----------|-------------|---------|----------|---------------------|-----------------------------------------------|
|          | 1 EMP <sup>a</sup>             | 0.00      | 1.000       | 2.00    | 3.00     | 2.00                | 1.00                                          |
|          | 1 PP                           | 2.00      | 0.830       | 1.67    | 2.50     | 2.67                | 0.83                                          |
| 3HB      | 0.33 EMP+0.67<br>NOG           | 0.00      | 1.33        | 0.00    | 0.00     | 0.67                | 1.33                                          |
|          | 0.38 PP+0.62 NOG               | 0.76      | 1.25        | 0.00    | 0.00     | 1.00                | 1.25                                          |
|          | 1 EMP                          | -2.00     | 1.00        | 0.00    | 3.00     | 2.00                | 1.00                                          |
|          | 1 PP                           | 0.33      | 0.83        | 0.00    | 2.50     | 2.67                | 0.83                                          |
|          | 0.75 PP+0.25 NOG               | -0.50     | 1.00        | -1.00   | 1.50     | 2.00                | 0.96                                          |
| 1,3-BDO  | 0.82<br>EMP+0.18NOG            | -2.18     | 1.09        | -0.72   | 2.19     | 1.64                | 1.05                                          |
|          | 0.46<br>EMP+0.27PP+0.27<br>NOG | -1.64     | 1.09        | -1.08   | 1.65     | 1.64                | 1.05                                          |

120 <sup>a</sup> Mol of glucose entering each carbon metabolism.

121 <sup>b</sup> The pathway yields (Y<sup>p</sup>) were obtained from equation (4) in Supplementary Note  
 122 considering NADH and NADPH are interconvertible.

123

124

125 **Table S5. Biochemical reactions for maximal glucose-to-product conversion with**  
126 **coordinated carbon metabolism.**

| <b>Product pathways</b> | <b>Biochemical reactions</b>                              |
|-------------------------|-----------------------------------------------------------|
| 3HB                     | Glucose $\rightarrow$ 1.33 3HB + 0.67 CO <sub>2</sub>     |
| 1,3-BDO                 | Glucose $\rightarrow$ 1.05 1,3-BDO + 1.80 CO <sub>2</sub> |

127

128 **Table S6. Specific activities of purified His<sub>6</sub>-tagged phosphoketolases from different**  
 129 **microorganisms.**

130 One unit of enzyme activity (U) is defined as conversion of 1 μmol of substrate per minute.

131 For R5P as the substrate, additional enzyme Rpe and RpiA was added at ten-fold

132 concentration of PK.

133

| <b>PK</b> | <b>Organisms</b>                      | <b>Substrates<br/>(10 mM)</b> | <b>Specific Activity<br/>(μmol/min/mg protein)</b> |
|-----------|---------------------------------------|-------------------------------|----------------------------------------------------|
| BaPK      | <i>Bifidobacterium adolescentis</i>   | F6P                           | 8.42                                               |
|           |                                       | R5P                           | 9.17                                               |
| LlPK      | <i>Lactococcus lactis</i>             | F6P                           | 7.26                                               |
|           |                                       | R5P                           | 14.06                                              |
| LcPK      | <i>Lactobacillus casei</i>            | F6P                           | 6.54                                               |
|           |                                       | R5P                           | 11.22                                              |
| PaPK      | <i>Pseudomonas aeruginosa</i><br>PAO1 | F6P                           | 5.54                                               |
|           |                                       | R5P                           | 5.43                                               |
| SyPK      | <i>Synechocystis</i> sp. PC 6803      | F6P                           | 4.69                                               |
|           |                                       | R5P                           | 5.73                                               |

134

135

136

137 **Table S7. Kinetic parameters of CARs towards 3-hydroxybutyrate.**

| <b>Enzyme</b> | <b><math>K_m</math> (mM)</b> | <b><math>k_{cat}</math> (min<sup>-1</sup>)</b> | <b><math>k_{cat}/K_m</math> (mM<sup>-1</sup>min<sup>-1</sup>)</b> |
|---------------|------------------------------|------------------------------------------------|-------------------------------------------------------------------|
| MmCAR         | 17.22±3.13                   | 10.86±0.88                                     | 0.61                                                              |
| MaCAR         | 10.87±3.30                   | 19.00±2.86                                     | 1.75                                                              |

138

139

140

141 **Table S8. Nucleotide sequence of HpdR/P<sub>hpdH</sub> wildtype or variant promoters.**

| Plasmids | Nucleotide Sequences                                                                                                                                                                                                                                                                                                          |
|----------|-------------------------------------------------------------------------------------------------------------------------------------------------------------------------------------------------------------------------------------------------------------------------------------------------------------------------------|
| wt       | (HpdR...) <b>cat</b> gcttgctctttatggcagttcggtc <b>cggcctcttaacgggcatgccacaggtgcggtgaa</b><br><b>cacctgaaggtaacgtgatccctgagctgcggcgagcccgtgaagaggtcgg</b> tacaggctgcccctgt<br>gctaaaacgcacagcggctgcgcgaaatctcgtgttccatccacgaaattactcactaagatggatc <b>gggac</b><br>aagaataaaaaacgaattcattaagaggagaaaggtacc <b>ATG</b> (...eGFP) |
| V1       | (HpdR...) <b>cat</b> gcttgctctttatggcagttcggtc <b>GTCGAC</b> tacaggctgcccctgtgctaaaacgc<br>acagcggctgcgcgaaatctcgtgttccatccacgaaattactcactaagatggatc <b>gggacaagaataaaa</b><br>aacgaattcattaagaggagaaaggtacc <b>ATG</b> (...eGFP)                                                                                             |
| V2       | (HpdR...) <b>cat</b> ggtacctttcctctttaaatacaattccggttacaagtattacacaaagttttatgttgaga<br>atattttttgat <b>GTCGAC</b> tacaggctgcccctgtgctaaaacgcacagcggctgcgcgaaatctcgtgt<br>ttcatccacgaaattactcactaagatggatc <b>gggacaagaataaaaaacgaattcattaagaggagaaag</b><br>gtacc <b>ATG</b> (...eGFP)                                        |
| V3       | (HpdR...) <b>cat</b> gcttgctctttatggcagttcggtc <b>GTCGAC</b> tacaggctgcccctgtgctaaaacgc<br>acagcggctgcgcgaaatctcgtgt <b>tgacac</b> cacgaaattactcac <b>gatact</b> ggatc <b>gggacaagaataaaa</b><br>aacgaattcattaagaggagaaaggtacc <b>ATG</b> (...eGFP)                                                                           |

142 Note: Bold triple nucleotides are start codons; nucleotides in red lower cases are the putative  
143 palindromic sequence (-209 to -118 bp); nucleotides in red upper cases denote *SaI* restriction  
144 site; nucleotides in grey shade denote -35 and -10 boxes in wildtype P<sub>hpdH</sub> promoter;  
145 nucleotides in green shade denote substituted -35 and -10 boxes from P<sub>LlacO1</sub> promoter;  
146 nucleotide in yellow shade is the transcription initiation site on P<sub>hpdH</sub> promoter.

147 **Table S9. Strains and plasmids used in this study.**

| <b>Strains</b>                | <b>Properties</b>                                                                                                                | <b>Source</b> |
|-------------------------------|----------------------------------------------------------------------------------------------------------------------------------|---------------|
| <i>E. coli</i> XL1-Blue       | <i>recA1 endA1 gyrA96 thi-1 hsdR17 supE44 relA1 lac F'</i> [ <i>traD36 proAB lacI<sup>q</sup>ZΔM15 Tn10 (Tet<sup>r</sup>)</i> ]  | Stratagene    |
| <i>E. coli</i> BL21 Star(DE3) | F <sup>-</sup> <i>ompT hsdSB (rB-mB-) gal dcm rne131</i> (DE3)                                                                   | Invitrogen    |
| <i>E. coli</i> BW25113 (F')   | <i>rrnBT14 ΔlacZWJ16 hsdR514 ΔaraBADAH33 ΔrhaBADLD78 F'</i> [ <i>traD36 proAB lacI<sup>q</sup>ZΔM15 Tn10(Tet<sup>r</sup>)</i> ]  | 2             |
| J01                           | <i>E. coli</i> BW25113 (F') Δ <i>edd</i>                                                                                         | This study    |
| J02                           | <i>E. coli</i> BW25113 (F') Δ <i>edd</i> Δ <i>pfkA</i>                                                                           | This study    |
| J03                           | <i>E. coli</i> BW25113 (F') Δ <i>edd</i> Δ <i>pfkB</i>                                                                           | This study    |
| J04                           | <i>E. coli</i> BW25113 (F') Δ <i>edd</i> Δ <i>pfkA</i> Δ <i>zwf</i>                                                              | This study    |
| J05                           | <i>E. coli</i> BW25113 (F') Δ <i>edd</i> Δ <i>pfkB</i> Δ <i>zwf</i>                                                              | This study    |
| J06                           | J03 with the 3HB pathway integrated into the genome at <i>asl</i> locus                                                          | This study    |
| J07                           | J06 with <i>P<sub>L</sub>lacO1</i> -dCas9 integrated into the genome at <i>dkgB</i> locus                                        | This study    |
| <b>Plasmids</b>               | <b>Properties</b>                                                                                                                | <b>Source</b> |
| pETDuet-1                     | <i>PT7, pBR322 ori, Amp<sup>r</sup></i>                                                                                          | Novagen       |
| pZE12-luc                     | <i>P<sub>L</sub>lacO1, colE ori, Amp<sup>r</sup></i>                                                                             | 3             |
| pCS27                         | <i>P<sub>L</sub>lacO1, P15A ori, Kan<sup>r</sup></i>                                                                             | 4             |
| pSA74                         | <i>P<sub>L</sub>lacO1, pSC101* ori, Cl<sup>r</sup></i>                                                                           | 5             |
| pSA-dCas9                     | pSA74 harboring dCas9 from <i>Streptococcus pyogenes</i>                                                                         | 6             |
| pCS-sgRNA                     | pCS27 harboring sgRNA targeting eGFP                                                                                             | 6             |
| pZE-eGFP                      | pZE12-luc harboring eGFP                                                                                                         | This study    |
| pZE-MmCAR                     | pZE12-luc harboring <i>car</i> from <i>Mycobacterium marinum</i> M and <i>sfp</i> amplified from <i>Bacillus subtilis</i> 168    | 7             |
| pZE-MaCAR                     | pZE12-luc harboring <i>car</i> from <i>Mycobacterium abscessus</i> and <i>sfp</i> amplified from <i>Bacillus subtilis</i> 168    | This study    |
| pZE-LIPK- <i>glpX</i>         | pZE12-luc harboring phosphoketolase (LIPK, KST82569.1) from <i>Lactococcus lactis</i> NCTC 6681, <i>glpX</i> from <i>E. coli</i> | This study    |



|                       |                                                                                                                                                             |            |
|-----------------------|-------------------------------------------------------------------------------------------------------------------------------------------------------------|------------|
| pZE-BaPK- <i>glpX</i> | pZE12-luc harboring phosphoketolase (BaPK, BAF39468.1) from <i>Bifidobacterium adolescentis</i> ATCC 15703, <i>glpX</i> from <i>E. coli</i>                 | This study |
| pZLPK                 | pZE12-luc harboring phosphoketolase (LIPK, KST82569.1) from <i>Lactococcus lactis</i> NCTC 6681, <i>glpX</i> and <i>tktA</i> from <i>E. coli</i>            | This study |
| pZBPK                 | pZE12-luc harboring phosphoketolase (BaPK, BAF39468.1) from <i>Bifidobacterium adolescentis</i> ATCC 15703, <i>glpX</i> and <i>tktA</i> from <i>E. coli</i> | This study |
| pZLPKx                | pZE12-luc harboring LIPK, <i>glpX</i> and <i>tktA</i> from <i>E. coli</i> under control of constitutive promoter library Plppx                              | This study |
| pSLPKx                | pSA74 harboring LIPK, <i>glpX</i> and <i>tktA</i> from <i>E. coli</i> under control of constitutive promoter library Plppx                                  | This study |
| p3HB                  | pCS27 carrying <i>thl</i> and <i>hbd</i> from <i>Clostridium difficile</i> 630 and <i>tesB</i> from <i>E. coli</i>                                          | This study |
| pETDuet-MmCAR         | pETDuet-1 harboring <i>car</i> from <i>Mycobacterium marinum</i> M and <i>sfp</i> amplified from <i>Bacillus subtilis</i> 168                               | This study |
| pETDuet-MaCAR         | pETDuet-1 harboring <i>car</i> from <i>Mycobacterium abscessus</i> and <i>sfp</i> amplified from <i>Bacillus subtilis</i> 168                               | This study |
| pETDuet-BaPK          | pETDuet-1 harboring BaPK from <i>Bifidobacterium adolescentis</i>                                                                                           | This study |
| pETDuet-LIPK          | pETDuet-1 harboring LIPK from <i>Lactococcus lactis</i>                                                                                                     | This study |
| pETDuet-LcPK          | pETDuet-1 harboring LcPK from <i>Lactobacillus casei</i>                                                                                                    | This study |
| pETDuet-PaPK          | pETDuet-1 harboring PaPK from <i>Pseudomonas aeruginosa</i>                                                                                                 | This study |
| pETDuet-SyPK          | pETDuet-1 harboring SyPK from <i>Synechocystis sp.</i> PCC 6803                                                                                             | This study |
| pETDuet-Rpi           | pETDuet-1 harboring <i>rpi</i> from <i>E. coli</i>                                                                                                          | This study |
| pETDuet-Rpe           | pETDuet-1 harboring <i>rpe</i> from <i>E. coli</i>                                                                                                          | This study |
| pZE-HpdR-eGFP         | pZE12-luc containing HpdR- $P_{hpdH}$ from <i>Pseudomonas putida</i> and eGFP                                                                               | This study |
| pCS-wt                | pCS27 containing HpdR- $P_{hpdH}$ -eGFP                                                                                                                     | This study |
| pCS-V1                | pCS-wt with deletion of a palindromic sequence (-209 to -118 bp) on the $P_{hpdH}$ promoter                                                                 | This study |
| pCS-V2                | pCS-V1 with HpdR under control of $P_{lpp1.0}$ promoter                                                                                                     | This study |
| pCS-V3                | pCS-V1 by substituting the -35 and -10 boxes of $P_{hpdH}$ promoter with those from $P_{lacO1}$ promoter                                                    | This study |
| pCS- <i>sgegfp-20</i> | pCS-sgRNA containing <i>sgegfp</i> with 20 bp spacer targeting eGFP at the start codon region with a TGG PAM site                                           | This study |
| pCS- <i>sgegfp-16</i> | pCS-sgRNA containing <i>sgegfp</i> with 16 bp spacer targeting eGFP at the start codon region with a TGG PAM site                                           | This study |
| pCS- <i>sgegfp-14</i> | pCS-sgRNA containing <i>sgegfp</i> with 14 bp spacer targeting eGFP at the start codon region with a TGG                                                    | This study |

|                          |                                                                                                                   |            |
|--------------------------|-------------------------------------------------------------------------------------------------------------------|------------|
|                          | PAM site                                                                                                          |            |
| pCS- <i>sgegfp-12</i>    | pCS-sgRNA containing <i>sgegfp</i> with 12 bp spacer targeting eGFP at the start codon region with a TGG PAM site | This study |
| pCS- <i>sgegfp-10</i>    | pCS-sgRNA containing <i>sgegfp</i> with 10 bp spacer targeting eGFP at the start codon region with a TGG PAM site | This study |
| pCS-V1- <i>sgaccA-14</i> | pCS-V1 harboring sgRNA targeting <i>accA</i> with 14 bp spacer                                                    | This study |
| pCS-V1- <i>sgaccA-12</i> | pCS-V1 harboring sgRNA targeting <i>accA</i> with 12 bp spacer                                                    | This study |
| pCS-V1- <i>sgaccA-10</i> | pCS-V1 harboring sgRNA targeting <i>accA</i> with 10 bp spacer                                                    | This study |
| pCS-V2- <i>sgfabD-14</i> | pCS-V2 harboring sgRNA targeting <i>fabD</i> with 14 bp spacer                                                    | This study |
| pCS-V2- <i>sgaccA-12</i> | pCS-V2 harboring sgRNA targeting <i>fabD</i> with 12 bp spacer                                                    | This study |
| pCS-V2- <i>sgaccA-10</i> | pCS-V2 harboring sgRNA targeting <i>fabD</i> with 10 bp spacer                                                    | This study |

---

148

149

150 **Reference**

- 151 1. D. Dugar and G. Stephanopoulos, *Nat. Biotechnol.*, 2011, **29**, 1074-1078.  
152 2. S. Atsumi, A. F. Cann, M. R. Connor, C. R. Shen, K. M. Smith, M. P. Brynildsen, K.  
153 J. Chou, T. Hanai and J. C. Liao, *Metab. Eng.*, 2008, **10**, 305-311.  
154 3. R. Lutz and H. Bujard, *Nucleic Acids Res.*, 1997, **25**, 1203-1210.  
155 4. C. R. Shen and J. C. Liao, *Metab. Eng.*, 2008, **10**, 312-320.  
156 5. Y.-X. Huo, K. M. Cho, J. G. L. Rivera, E. Monte, C. R. Shen, Y. Yan and J. C. Liao,  
157 *Nat. Biotechnol.*, 2011, **29**, 346-351.  
158 6. J. Wang, Y. Wu, X. Sun, Q. Yuan and Y. Yan, *ACS Syn. Biol.*, 2017, **6**, 1922-1930.  
159 7. Z. Chen, X. Sun, Y. Li, Y. Yan and Q. Yuan, *Metab. Eng.*, 2017, **39**, 102-109.

160
